# Supplementary material for: Patient values and preferences on valve replacement for aortic stenosis: a systematic review
Source: PubMed Central journal article supplement — Heart. 2021 Feb 9;107(16):1289–95. doi: 10.1136/heartjnl-2020-318334 (PMC8327404; doi:10.1136/heartjnl-2020-318334), 2021-02-09
Supplement: heartjnl-2020-318334supp001.pdf [file heartjnl-2020-318334supp001.pdf]

## **Appendix Table of Content**

Appendix 1 = MOOSE Checklist.

Appendix 2 = Search strategy example – MEDLINE.

Appendix Table 1 = Excluded studies, with reasons.

Appendix Table 2 = Additional study and participant demographics.

Appendix Table 3 = Qualitative study quality.

Appendix Table 4 = Quantitative study quality.

Appendix Table 5 = Qualitative results – CERQual Summary of Findings.

**Appendix 1. MOOSE Checklist for Meta-analyses of Observational Studies**

| <b>Item No</b>                              | <b>Recommendation</b>                                                                                            | <b>Reported on Page No</b> |
|---------------------------------------------|------------------------------------------------------------------------------------------------------------------|----------------------------|
| Reporting of background should include      |                                                                                                                  |                            |
| 1                                           | Problem definition                                                                                               | 3                          |
| 2                                           | Hypothesis statement                                                                                             | N/A                        |
| 3                                           | Description of study outcome(s)                                                                                  | 4                          |
| 4                                           | Type of exposure or intervention used                                                                            | 4                          |
| 5                                           | Type of study designs used                                                                                       | 4                          |
| 6                                           | Study population                                                                                                 | 4                          |
| Reporting of search strategy should include |                                                                                                                  |                            |
| 7                                           | Qualifications of searchers (e.g., librarians and investigators)                                                 | 3,4                        |
| 8                                           | Search strategy, including time period included in the synthesis and key words                                   | 3, 25-27                   |
| 9                                           | Effort to include all available studies, including contact with authors                                          | 3,4                        |
| 10                                          | Databases and registries searched                                                                                | 4                          |
| 11                                          | Search software used, name and version, including special features used (e.g., explosion)                        | N/A                        |
| 12                                          | Use of hand searching (e.g., reference lists of obtained articles)                                               | 4                          |
| 13                                          | List of citations located and those excluded, including justification                                            | 16, 28-30                  |
| 14                                          | Method of addressing articles published in languages other than English                                          | N/A                        |
| 15                                          | Method of handling abstracts and unpublished studies                                                             | 4                          |
| 16                                          | Description of any contact with authors                                                                          | 4                          |
| Reporting of methods should include         |                                                                                                                  |                            |
| 17                                          | Description of relevance or appropriateness of studies assembled for assessing the hypothesis to be tested       | 5                          |
| 18                                          | Rationale for the selection and coding of data (e.g., sound clinical principles or convenience)                  | 5                          |
| 19                                          | Documentation of how data were classified and coded (e.g., multiple raters, blinding and interrater reliability) | 5                          |

|                                         |                                                                                                                                                                                                                                                                                |        |
|-----------------------------------------|--------------------------------------------------------------------------------------------------------------------------------------------------------------------------------------------------------------------------------------------------------------------------------|--------|
| 20                                      | Assessment of confounding (e.g., comparability of cases and controls in studies where appropriate)                                                                                                                                                                             | N/A    |
| 21                                      | Assessment of study quality, including blinding of quality assessors, stratification or regression on possible predictors of study results                                                                                                                                     | 5      |
| 22                                      | Assessment of heterogeneity                                                                                                                                                                                                                                                    | N/A    |
| 23                                      | Description of statistical methods (e.g., complete description of fixed or random effects models, justification of whether the chosen models account for predictors of study results, dose-response models, or cumulative meta-analysis) in sufficient detail to be replicated | N/A    |
| 24                                      | Provision of appropriate tables and graphics                                                                                                                                                                                                                                   | 16-22  |
| Reporting of results should include     |                                                                                                                                                                                                                                                                                |        |
| 25                                      | Graphic summarizing individual study estimates and overall estimate                                                                                                                                                                                                            | N/A    |
| 26                                      | Table giving descriptive information for each study included                                                                                                                                                                                                                   | 17     |
| 27                                      | Results of sensitivity testing (e.g., subgroup analysis)                                                                                                                                                                                                                       | N/A    |
| 28                                      | Indication of statistical uncertainty of findings                                                                                                                                                                                                                              | N/A    |
| Reporting of discussion should include  |                                                                                                                                                                                                                                                                                |        |
| 29                                      | Quantitative assessment of bias (e.g., publication bias)                                                                                                                                                                                                                       | N/A    |
| 30                                      | Justification for exclusion (e.g., exclusion of non-English language citations)                                                                                                                                                                                                | N/A    |
| 31                                      | Assessment of quality of included studies                                                                                                                                                                                                                                      | 33, 34 |
| Reporting of conclusions should include |                                                                                                                                                                                                                                                                                |        |
| 32                                      | Consideration of alternative explanations for observed results                                                                                                                                                                                                                 | 12-14  |
| 33                                      | Generalization of the conclusions (i.e., appropriate for the data presented and within the domain of the literature review)                                                                                                                                                    | 14     |
| 34                                      | Guidelines for future research                                                                                                                                                                                                                                                 | 14     |
| 35                                      | Disclosure of funding source                                                                                                                                                                                                                                                   | 16     |

*From:* Stroup DF, Berlin JA, Morton SC, et al, for the Meta-analysis Of Observational Studies in Epidemiology (MOOSE) Group. Meta-analysis of Observational Studies in Epidemiology. A Proposal for Reporting. *JAMA*. 2000;283(15):2008-2012. doi: 10.1001/jama.283.15.2008

## Appendix 2. Search strategy example – MEDLINE.

Database searched = OVID Medline Epub Ahead of Print, In-Process & Other Non-Indexed Citations, Ovid MEDLINE(R) Daily and Ovid MEDLINE(R) 1946 to Present

1. \*Attitude to Health/
2. \*Patient Participation/
3. preference\*.ti,ab.
4. \*Patient Preference/
5. choice.ti.
6. choices.ti.
7. value\*.ti.
8. health state values.ti,ab.
9. valuation\*.ti.
10. expectation\*.ti,ab.
11. attitude\*.ti,ab.
12. acceptab\*.ti,ab.
13. knowledge.ti,ab.
14. point of view.ti,ab.
15. user participation.ti,ab.
16. users participation.ti,ab.
17. users' participation.ti,ab.
18. user's participation.ti,ab.
19. patient participation.ti,ab.
20. patients' participation.ti,ab.
21. patients participation.ti,ab.
22. patient's participation.ti,ab.
23. patient perspective\*.ti,ab.
24. patients perspective\*.ti,ab.
25. patients' perspective\*.ti,ab.

26. patient's perspective\*.ti,ab.
27. patient perce\*.ti,ab.
28. patients perce\*.ti,ab.
29. patients' perce\*.ti,ab.
30. patient's perce\*.ti,ab.
31. health perception\*.ti,ab.
32. user view\*.ti,ab.
33. users view\*.ti,ab.
34. users' view\*.ti,ab.
35. user's view\*.ti,ab.
36. patient view\*.ti,ab.
37. patients view\*.ti,ab.
38. patients' view\*.ti,ab.
39. patient's view\*.ti,ab.
40. or/1-39
41. patient\*.ti.
42. user\*.ti.
43. men.ti.
44. women.ti.
45. or/41-44
46. exp \*Decision Making/
47. decision mak\*.ti,ab.
48. decisions mak\*.ti,ab.
49. decision\*.ti.
50. mak\*.ti.
51. 49 and 50
52. avoidance learning/
53. 46 or 47 or 48 or 51 or 52
54. 45 and 53
55. discrete choice.ti,ab.
56. decision board\*.ti,ab.

57. decision analy\*.ti,ab.
58. decision-support.ti,ab.
59. decision tool\*.ti,ab.
60. decision aid\*.ti,ab.
61. discrete-choice\*.ti,ab.
62. decision\*.ti,ab.
63. 55 or 56 or 57 or 58 or 59 or 60 or 61 or 62
64. 45 and 63
65. 54 or 64
66. decision support techniques/
67. (health and utilit\*).ti.
68. gamble\*.ti,ab.
69. prospect theory.ti,ab.
70. preference score.ti,ab.
71. preference elicitation.ti,ab.
72. health utilit\*.ti,ab.
73. (utility and (value\* or score\* or estimate\*)).mp. [mp=title, abstract, original title, name of substance word, subject heading word, floating sub-heading word, keyword heading word, organism supplementary concept word, protocol supplementary concept word, rare disease supplementary concept word, unique identifier, synonyms]
74. health state.ti,ab.
75. feeling thermometer\*.ti,ab.
76. best-worst scaling.ti,ab.
77. best worst scaling.mp.
78. best worst.ti,ab.
79. TTO.ti,ab.
80. time trade-off.ti,ab.
81. probability trade-off.ti,ab.
82. or/66-81
83. Choice Behavior/

84. or/66-83
85. preference based.ti,ab.
86. preference score.ti,ab.
87. multiattribute.ti,ab.
88. multi attribute.mp.
89. EuroQoL 5D.mp.
90. EuroQoL5D.ti,ab.
91. EQ5D.mp.
92. EQ 5D.ti,ab.
93. SF6D.ti,ab.
94. SF 6D.ti,ab.
95. HUI.ti,ab.
96. 15D.ti,ab.
97. or/85-96
98. SF36.ti,ab.
99. SF 36.ti,ab.
100. SF12.ti,ab.
101. SF 12.mp.
102. HRQoL.ti,ab.
103. QoL.ti,ab.
104. quality of life.ti,ab.
105. "Quality of Life"/
106. or/98-105
107. 40 or 65 or 84 or 97 or 106
108. Aortic Stenosis.mp. or exp Aortic Valve Stenosis/
109. (aortic valve implantation or TAVR or transcatheter or transfemoral or transapical or transaxillary or SAVR or heart valve replacement or surgical aortic valve replacement or surgical AVR or SAVR or TAVI or aortic valve replacement or transvascular).af.
110. 107 and 108 and 109
111. limit 110 to humans

**Appendix Table 1. Excluded studies, with reasons.**

| #  | Title                                                                                                                                                                                                                  | First author | Year | Reason for exclusion                         |
|----|------------------------------------------------------------------------------------------------------------------------------------------------------------------------------------------------------------------------|--------------|------|----------------------------------------------|
| 1  | Toronto Aortic Stenosis Quality of Life Scale (TASQ): Development and quality of life in aortic stenosis and TAVI patients                                                                                             | Styra        | 2019 | Abstract only                                |
| 2  | Rapid-cycle development of decision support tools for patients with symptomatic aortic stenosis                                                                                                                        | Knoepke      | 2018 | Abstract only                                |
| 3  | Risk willingness and survival in patients with severe aortic stenosis                                                                                                                                                  | Hussain      | 2019 | Abstract only                                |
| 4  | A learning curve for shared decision making: The impact of physician experience on decision aid efficacy in severe aortic stenosis                                                                                     | Coylewright  | 2018 | Abstract only                                |
| 5  | Subjective preferences and goal among the patients treated with transaortic valvular replacement                                                                                                                       | Sugiura      | 2019 | Abstract only                                |
| 6  | Patients and their physicians do not agree on shared decision making in transcatheter aortic valve replacement                                                                                                         | Coylewright  | 2016 | Not about values and preferences elicitation |
| 7  | Is it worth it? A collaborative clinical decision making exercise using an old-school debate                                                                                                                           | Wright       | 2016 | Not about values and preferences elicitation |
| 8  | The medically managed patient with severe symptomatic aortic stenosis in the TAVR era: Patient characteristics, reasons for medical management, and quality of shared decision making at heart valve treatment centers | Dharmarajan  | 2017 | Not about values and preferences elicitation |
| 9  | Patients' Decision Making About Undergoing Transcatheter Aortic Valve Implantation for Severe Aortic Stenosis                                                                                                          | Olsson       | 2016 | Not about values and preferences elicitation |
| 10 | Determinants and Outcome of Decision Making Among Patients with Severe Aortic Stenosis                                                                                                                                 | Hussain      | 2017 | Not about values and preferences elicitation |



|    |                                                                                                                                                                                                                                               |             |      |                                              |
|----|-----------------------------------------------------------------------------------------------------------------------------------------------------------------------------------------------------------------------------------------------|-------------|------|----------------------------------------------|
| 11 | Patients' self-reported function, symptoms and health-related quality of life before and 6 months after transcatheter aortic valve implantation and surgical aortic valve replacement                                                         | Olsson      | 2017 | Not about values and preferences elicitation |
| 12 | Self-reported health status, treatment decision and survival in asymptomatic and symptomatic patients with aortic stenosis in a Western Norway population undergoing conservative treatment: a cross-sectional study with 18 months follow-up | Oterhals    | 2017 | Not about values and preferences elicitation |
| 13 | [ANMCO/SIC/SICI-GISE/SICCH Consensus document: Risk stratification in elderly patients undergoing cardiac surgery and transcatheter aortic valve implantation]                                                                                | Pulignano   | 2016 | Not about values and preferences elicitation |
| 14 | Patients and informal caregivers' experience of surgical and transcatheter aortic valve replacement: Real-world data contributing to establish value-based medicine in Denmark                                                                | Rosseel     | 2019 | Not about values and preferences elicitation |
| 15 | Current decision making and short-term outcome in patients with degenerative aortic stenosis: the Pooled-Rotterdam-Milano-Toulouse In Collaboration Aortic Stenosis survey                                                                    | Van Mieghem | 2016 | Not about values and preferences elicitation |
| 16 | Factors influencing the choice between transcatheter and surgical treatment of severe aortic stenosis in patients younger than 80 years: Results from the OBSERVANT study                                                                     | Tarantini   | 2020 | Not about values and preferences elicitation |
| 17 | Transforming the experience of aortic valve disease in older patients: A qualitative study                                                                                                                                                    | Kirk        | 2019 | Not about values and preferences elicitation |
| 18 | Long-term outcomes of transcatheter versus surgical aortic valve replacement in low risk, elderly patients with severe aortic stenosis                                                                                                        | Kang        | 2019 | Not about values and preferences elicitation |

|    |                                                                                                                                                         |                   |      |                                              |
|----|---------------------------------------------------------------------------------------------------------------------------------------------------------|-------------------|------|----------------------------------------------|
| 19 | Reasons for choosing conservative management in symptomatic patients with severe aortic stenosis - Observations from the CURRENT AS registry            | Ishii             | 2019 | Not about values and preferences elicitation |
| 20 | Patient disposition and clinical outcome after referral to a dedicated TAVI clinic                                                                      | Gorecka           | 2019 | Not about values and preferences elicitation |
| 21 | Validation of a Heart Team Performance for Patients with Severe Aortic Stenosis                                                                         | D'Aronco          | 2019 | Not about values and preferences elicitation |
| 22 | The Learning Curve for Shared Decision-making in Symptomatic Aortic Stenosis                                                                            | Coylewright       | 2020 | Not about values and preferences elicitation |
| 23 | Pilot Study of a Patient Decision Aid for Valve Choices in Surgical Aortic Valve Replacement                                                            | Anaya             | 2019 | Not about values and preferences elicitation |
| 24 | Exploring the experience of early discharge after transcatheter aortic valve implantation for older adults and their informal caregivers (Dissertation) | Knoll             | 2018 | Not about values and preferences elicitation |
| 25 | Living with Aortic Stenosis: A Phenomenological Study of Patients' Experiences and Subsequent Health Choices (Dissertation)                             | Hagen-Peter       | 2015 | Not about values and preferences elicitation |
| 26 | Low Gradient Aortic Stenosis: Who Benefits From Intervention?                                                                                           | Baumgartner       | 2019 | Not primary study                            |
| 27 | TAVR in Patients With End-Stage Renal Disease and Critical Aortic Stenosis: Hard Choices                                                                | Bayliss           | 2019 | Not primary study                            |
| 28 | Quality of life after transcatheter aortic valve replacement                                                                                            | Bonow             | 2017 | Not primary study                            |
| 29 | TAVR: A Good Fix, But It Cannot Fix Everything                                                                                                          | Carabello         | 2016 | Not primary study                            |
| 30 | Treating of aortic valve stenosis in real-life: A multifaceted decision-making challenge                                                                | Franken           | 2017 | Not primary study                            |
| 31 | Are transcatheter procedures the treatment of choice for all patients with severe aortic stenosis?                                                      | Hernandez-Vaquero | 2017 | Not primary study                            |

|    |                                                                                                                                |           |      |                   |
|----|--------------------------------------------------------------------------------------------------------------------------------|-----------|------|-------------------|
| 32 | The less complex the case is, the more complex is it to choose? The case of lower risk patients with aortic valve stenosis     | Lemos     | 2018 | Not primary study |
| 33 | Elevating Aortic Stenosis Treatment?                                                                                           | McCabe    | 2018 | Not primary study |
| 34 | Transcatheter aortic valve implantation in patients with severe aortic stenosis: Does lower-risk profile mean a young patient? | Michel    | 2019 | Not primary study |
| 35 | Transcatheter aortic valve replacement: Suitable for all?                                                                      | Minakata  | 2018 | Not primary study |
| 36 | Aortic stenosis: Treat the patient not the numbers                                                                             | Otto      | 2018 | Not primary study |
| 37 | Surgical or transcatheter aortic-valve replacement                                                                             | Reyes     | 2017 | Not primary study |
| 38 | From knowledge to wisdom                                                                                                       | Sousa-Uva | 2018 | Not primary study |
| 39 | TAVR - The future of aortic stenosis management                                                                                | Ullah     | 2016 | Not primary study |

**Appendix Table 2. Additional study and participant demographics.**

| Study                                            | Data collection period   | Setting                               | Funding source                                                                                                                                                               | Conflicts of interest                                                                                                                                                                          |
|--------------------------------------------------|--------------------------|---------------------------------------|------------------------------------------------------------------------------------------------------------------------------------------------------------------------------|------------------------------------------------------------------------------------------------------------------------------------------------------------------------------------------------|
| Quantitative studies                             |                          |                                       |                                                                                                                                                                              |                                                                                                                                                                                                |
| Marsh 2020                                       | July-August 2018         | Not applicable (online survey)        | Edwards Lifesciences                                                                                                                                                         | Two authors are employees of Edwards Lifesciences. Three studies are employees of Evidera. Evidera received funding from Edwards Lifesciences to conduct the study and develop the manuscript. |
| Hussain 2016                                     | May 2010-April 2014      | Large university hospital             | Norwegian Health Association and Inger and John Fredriksen                                                                                                                   | No conflict of interest                                                                                                                                                                        |
| Qualitative studies                              |                          |                                       |                                                                                                                                                                              |                                                                                                                                                                                                |
| Coylewright 2015                                 | June 2012-August 2014    | Tertiary academic medical institution | No funding sources                                                                                                                                                           | No conflict of interest                                                                                                                                                                        |
| Olsson 2016                                      | May 2010-June 2011       | Large university hospital             | Vasterbotten's County Council, Umea University, and The Heart Foundation of Northern Sweden                                                                                  | No conflict of interest                                                                                                                                                                        |
| Skaar 2017                                       | February 2014-April 2015 | Large university hospital             | Grieg Foundation, Department of Heart Disease, Haukeland University Hospital and Kavli Research Centre for Geriatrics and Dementia, Haraldsplass Deaconess Hospital, Bergen. | NR                                                                                                                                                                                             |
| Lauck 2016                                       | NR                       | Provincial cardiac TAVI center        | Providence Health Care Nursing Research Competition                                                                                                                          | Four authors are consultants to Edward Lifesciences. One author is a consultant for Edward Lifesciences, St. Jude Medical and Abbott Inc., HearthWare, and Norvasc.                            |
| Ontario Health Technology Assessment Series 2018 | NR                       | Not applicable (phone interview)      | Health Quality Ontario                                                                                                                                                       | NR                                                                                                                                                                                             |

|                             |           |                                                |                                                                                |    |
|-----------------------------|-----------|------------------------------------------------|--------------------------------------------------------------------------------|----|
| Frank<br>2019/Styra<br>2019 | 2015-2017 | Tertiary<br>academic<br>medical<br>institution | Partially funded from Edwards<br>Lifesciences (manufacturer of<br>TAVI valves) | NR |
|-----------------------------|-----------|------------------------------------------------|--------------------------------------------------------------------------------|----|

NR = Not reported.

**Appendix Table 3. Qualitative study quality.**

| Study                                                                                   | Coylewright 2016 | Ontario Health Technology Assessment Series 2018 | Lauck 2015 | Olsson 2019      | Skaar 2019       | Styra/Frank 2019 |
|-----------------------------------------------------------------------------------------|------------------|--------------------------------------------------|------------|------------------|------------------|------------------|
| 1. Was there a clear statement of the aims of the research?                             | Yes              | Yes                                              | Yes        | Yes              | Yes              | Yes              |
| 2. Is a qualitative methodology appropriate?                                            | Yes              | Yes                                              | Yes        | Yes              | Yes              | Yes              |
| 3. Was the research design appropriate to address the aims of the research?             | Yes              | Yes                                              | Yes        | Yes              | Yes              | Yes              |
| 4. Was the recruitment strategy appropriate to the aims of the research?                | No               | Can't tell                                       | No         | Yes              | Yes              | Yes              |
| 5. Was the data collected in a way that addressed the research issue?                   | Yes              | Yes                                              | Yes        | Yes              | Yes              | Can't tell       |
| 6. Has the relationship between researcher and participants been adequately considered? | Can't tell       | No                                               | No         | No               | Yes              | No               |
| 7. Have ethical issues been taken into consideration?                                   | Yes              | Can't tell                                       | Yes        | Yes              | Yes              | Yes              |
| 8. Was the data analysis sufficiently rigorous?                                         | No               | Can't tell                                       | Yes        | Yes              | Yes              | Can't tell       |
| 9. Is there a clear statement of findings?                                              | Yes              | Yes                                              | Yes        | Yes              | Yes              | Yes              |
| Overall methodological limitations                                                      | Moderate         | Serious                                          | Moderate   | No or very minor | No or very minor | No or very minor |

**Appendix Table 4. Quantitative study quality.**

| <b>Risk of bias criteria</b>                              |                                                                                           | <b>Hussain 2016</b>   | <b>Marsh 2020</b>     |
|-----------------------------------------------------------|-------------------------------------------------------------------------------------------|-----------------------|-----------------------|
| Selection of participants into the study                  | Was an appropriate study sample selected from the sampling frame?                         | Moderate risk of bias | Serious risk of bias  |
| Completeness of data                                      | Was the attrition sufficiently low to minimize the risk of bias?                          | Moderate risk of bias | Serious risk of bias  |
| Measurement Instrument: Choice of the methodology         | Was the instrument used for eliciting relative importance of outcomes valid and reliable? | Moderate risk of bias | Low risk of bias      |
| Measurement Instrument: Administration of the methodology | Was the instrument administered in the intended way?                                      | Low risk of bias      | Moderate risk of bias |
| Measurement Instrument: Outcome presentation              | Was a valid representation of the outcome (health state) utilized?                        | Moderate risk of bias | Serious risk of bias  |
| Measurement Instrument: Understanding of the methodology  | Did the researchers check the understanding of the instrument?                            | Moderate risk of bias | Low risk of bias      |
| Data analysis                                             | Were the results analyzed appropriately to avoid influence of bias and confounding?       | Moderate risk of bias | Serious risk of bias  |

**Appendix Table 5. Qualitative results - CERQual Summary of Findings**

| Summary of Qualitative Review Findings                                                                                                                                                                                                        | Reference              | Explanation of CERQual assessment                                                                                                                                                                                               |
|-----------------------------------------------------------------------------------------------------------------------------------------------------------------------------------------------------------------------------------------------|------------------------|---------------------------------------------------------------------------------------------------------------------------------------------------------------------------------------------------------------------------------|
| <b>Values and preferences concerning perioperative mortality risk of procedure</b>                                                                                                                                                            |                        |                                                                                                                                                                                                                                 |
| Patients with severe aortic stenosis viewed declining treatment to be worse than accepting the risk related to the procedure                                                                                                                  | <sup>23</sup>          | Limited, thin data to support this finding, only one study that did address both TAVI and SAVR                                                                                                                                  |
| Risk willingness varied considerably, but many patients were generally willing to accept a high perioperative mortality risk when undergoing aortic valve replacement                                                                         | <sup>21 23</sup>       | Limited, thin data to support this finding, not enough studies, not enough settings, and studies did not address both TAVI and SAVR.                                                                                            |
| <b>Values and preferences concerning health-related quality of life when deciding on treatment</b>                                                                                                                                            |                        |                                                                                                                                                                                                                                 |
| <i>Function/ activities of daily living</i>                                                                                                                                                                                                   |                        |                                                                                                                                                                                                                                 |
| Patients aimed for improved body function, better health and activities of daily living when deciding on treatment.                                                                                                                           | <sup>21 27 23 22</sup> | Studies with methodological limitations, limited, thin data to support this finding, not enough studies, not enough settings and all but one study did not address both TAVI and SAVR, and when it was reported it was separate |
| Patient-defined goals central to decision-making included specific activities and hobbies.                                                                                                                                                    | <sup>21 27 23 24</sup> | Studies with methodological limitations, limited, thin data to support this finding, not enough studies, not enough settings and studies did not address both TAVI and SAVR.                                                    |
| Patients emphasized importance of managing by oneself or be independent as reasons to undergo treatment.                                                                                                                                      | <sup>21 27 24 22</sup> | Studies with methodological limitations, limited, thin data to support this finding, not enough studies, not enough settings and studies did not address both TAVI and SAVR.                                                    |
| <i>Improve quality of life</i>                                                                                                                                                                                                                |                        |                                                                                                                                                                                                                                 |
| Patients hoped the procedure would improve their quality of life, and spoke of their desire to get back to 'normal', have a 'good life' or have a 'new lease on life' when deciding on treatment.                                             | <sup>27 22 23 24</sup> | Studies with methodological limitations, limited, thin data to support this finding, not enough studies, not enough settings and studies and studies did not address both TAVI and SAVR                                         |
| <i>Maintaining independence/ obligations</i>                                                                                                                                                                                                  |                        |                                                                                                                                                                                                                                 |
| Patients reported their sense of responsibility to maintain the best possible health condition to be able to fulfill their obligations, including on financial management, maintaining one's home and participating in day-to-day activities. | <sup>21 27 24 22</sup> | Studies with methodological limitations, limited, thin data to support this finding, not enough studies, not enough settings and all but one study did not address both TAVI and SAVR, and when it was reported it was separate |



|                                                                                                                                                                                                    |                        |                                                                                                                                                                                                                                                                  |
|----------------------------------------------------------------------------------------------------------------------------------------------------------------------------------------------------|------------------------|------------------------------------------------------------------------------------------------------------------------------------------------------------------------------------------------------------------------------------------------------------------|
| Some patients reported that they felt an obligation to their relatives to accept a treatment that was recommended.                                                                                 | <sup>27 23</sup>       | Studies with methodological limitations, limited, thin data to support this finding, uncommon, but important finding, not enough studies, not enough settings and all but one study did not address both TAVI and SAVR, and when it was reported it was separate |
| <b>Values and preferences concerning pain and risk of stroke</b>                                                                                                                                   |                        |                                                                                                                                                                                                                                                                  |
| Some patients were concerned about pain or getting a stroke after the procedure.                                                                                                                   | <sup>22</sup>          | Study with methodological limitations, uncommon, but important finding, only one study and TAVI and SAVR was reported separately                                                                                                                                 |
| <b>Values and preferences related to decision-making guidance on treatment and practical issues</b>                                                                                                |                        |                                                                                                                                                                                                                                                                  |
| Patients stressed the importance of a trusting relationship with their physician(s) as essential sources of information, decision-making guidance and facilitators of referral and decision-making | <sup>21 27 23</sup>    | Studies with methodological limitations, thin data to support this finding, not enough studies, not enough settings and studies did not address both TAVI and SAVR, and when it was reported it was separate                                                     |
| There was a high degree of variability on the reliance on informal social support provided by family, friends and community members on their decision making.                                      | <sup>21 27 23</sup>    | Studies with methodological limitations, thin data to support this finding, not enough studies, not enough settings and studies did not address both TAVI and SAVR, and when it was reported it was separate                                                     |
| Patients and caregivers noted that the costs involved with travel and a longer hospital stay were an additional burden and a potential barrier to receiving SAVR.                                  | <sup>22 21 23 27</sup> | All but one study did not address both TAVI and SAVR, and when it was reported it was separate                                                                                                                                                                   |
